# Supplementary material for: A thermally activated delayed fluorescence photosensitizer for photodynamic therapy of oral squamous cell carcinoma under low laser intensity
Source: Royal Society of Chemistry journal article supplement (doi:10.1039/d1tb00719j), 2021-01-01
Supplement: d1tb00719j1.pdf [file d1tb00719j1.pdf]

**Thermally activated delayed fluorescent photosensitizer for  
photodynamic therapy of oral squamous cell carcinoma under low  
laser intensity**

Shiqi Hu<sup>1,#</sup>, Bin Huang<sup>2,#</sup>, Yumei Pu<sup>3</sup>, Chengwan Xia<sup>3</sup>, Qian Zhang<sup>3</sup>, Sulong Guo<sup>2</sup>, Yuxin Wang<sup>3,\*</sup>,  
Xiaofeng Huang<sup>1,\*</sup>

<sup>1</sup> Department of Oral Pathology, Nanjing Stomatology Hospital, Medical School of Nanjing  
University, Nanjing, China

<sup>2</sup> College of Life Sciences and Chemistry, Jiangsu Key Laboratory of Biofunctional Molecule,  
Jiangsu Second Normal University, Nanjing, China

<sup>3</sup> Department of Oral and Maxillofacial Surgery, Nanjing Stomatology Hospital, Medical School of  
Nanjing University, Nanjing, China

**\* CORRESPONDING AUTHOR**

Xiaofeng Huang, Department of Oral Pathology, Nanjing Stomatology Hospital, Medical School  
of Nanjing University, Nanjing, China

Email: hxf681008@sina.com

Yuxin Wang, Department of Oral and Maxillofacial Surgery, Nanjing Stomatology Hospital,  
Medical School of Nanjing University, Nanjing, China

Email: wangyuxin0212@126.com

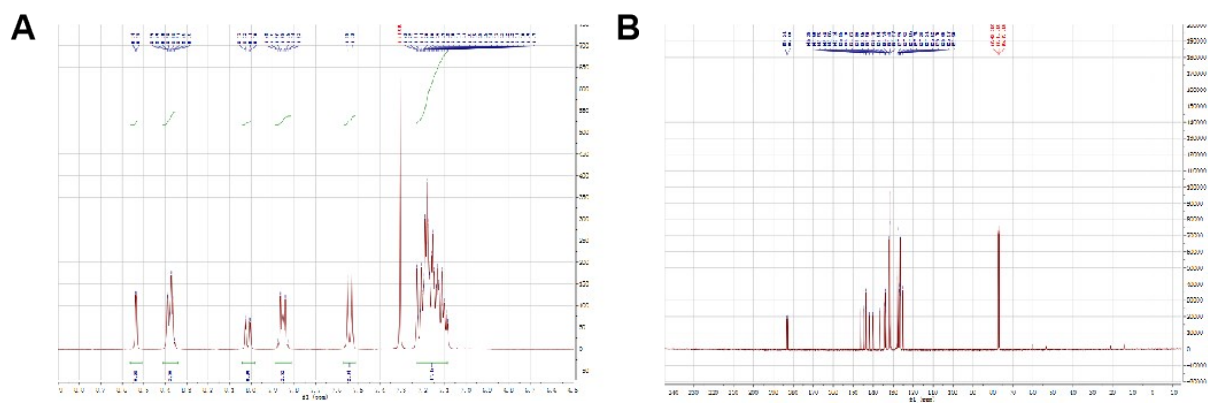

Figure S1. (A)  $^1\text{H}$  NMR and (B)  $^{13}\text{C}$  NMR spectrum of TPE-AQ

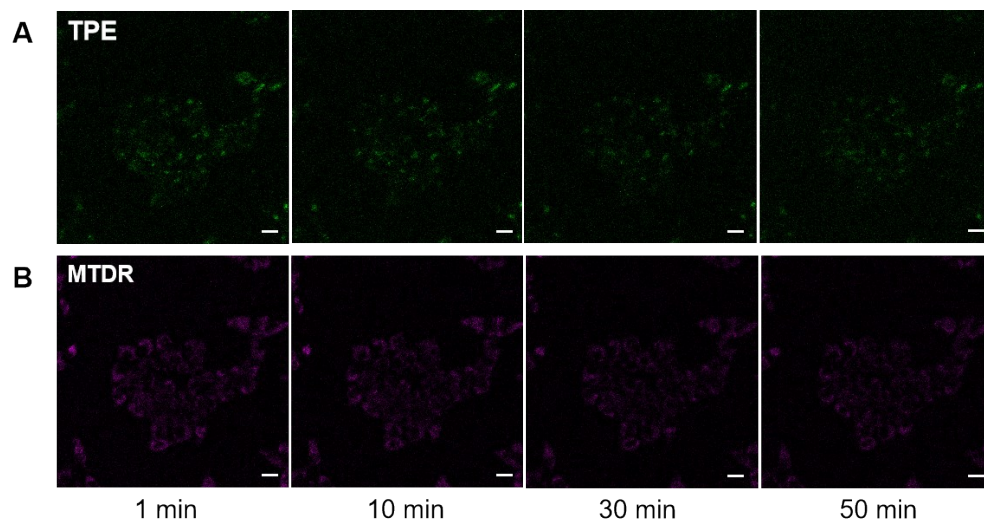

**Figure S2.** Fluorescence images of (A) TPE-AQ NPs and (B) MTDR stained with CAL27 cells after 1 min, 10 min, 30 min, and 50 min. Scale bars=20  $\mu$ m.

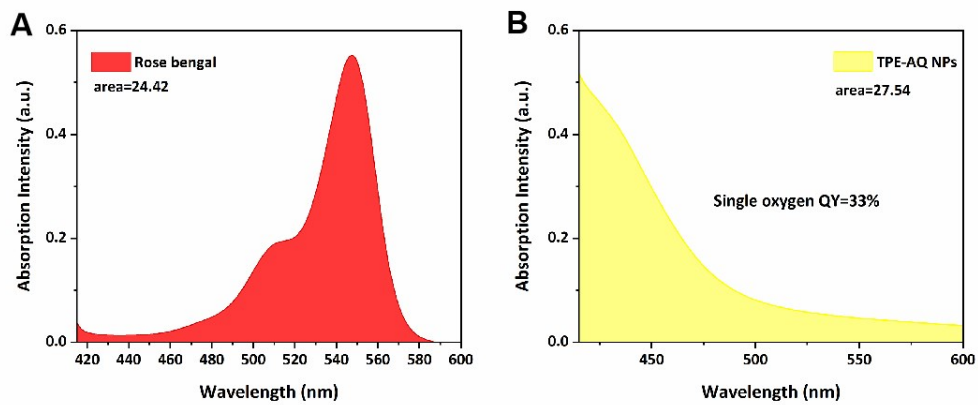

**Figure S3.** The absorption peak area of the (A) Rose bengal, (B) the TPE-AQ NPs dispersed in deionized water respectively. The  $^1\text{O}_2$  quantum yields are calculated according to the following formulas:

$$\Phi_{\text{sample}} = \Phi_{\text{rose bengal}} \times K_{\text{sample}} \times A_{\text{rose bengal}} / (K_{\text{rose bengal}} \times A_{\text{sample}})$$

( $^1\text{O}_2$  quantum yield  $\Phi_{\text{rose bengal}} = 75\%$  in water)

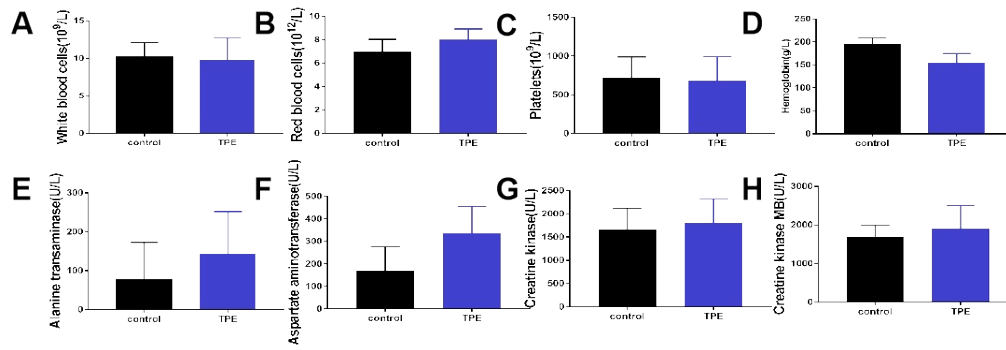

**Figure S4.** Changes in the amounts of (A) red blood cells, (B) white blood cells, (C) hemoglobin, (D) platelets, (E) alanine transaminase, (F) aspartate transaminase, (G) creatine kinase and (H) creatine kinase isoenzyme in the mice.
